# Supplementary material for: BEHRT: Transformer for Electronic Health Records
Source: PubMed Central journal article supplement (PMC7189231; doi:10.1038/s41598-020-62922-y), 2020-04-28

## **BEHRT: Transformer for Electronic Health Records**

**Mr. Yikuan Li , Mr. Shishir Rao, Dr. Jose Roberto Ayala Solares, Dr. Abdelaali Hassaine, Dr. Rema Ramakrishnan, Dr. Dexter Canoy, Dr. Yajie Zhu, Dr. Kazem Rahimi, Dr. Gholamreza Salimi-Khorshidi**

### **Supplementary Information**

Legend:

Table S1: This table provides the basic statistics for the characteristics of the selected cohorts.

Table S2: This table shows the Hyperparameter tuning results for BEHRT. The columns are various hyperparameters and the rows are different runs. The bold items are best performing.

Table S3: This table shows the top ten associations for each disease that occurred in at least 1% of the population. Each row is a disease and the columns are the ten diseases associated to said disease. The annotation “Good” means that the medical validator defined the association as a medically valid association and “Not Good” means that the medical validator defined the association as medically invalid.

Table S4: This table shows the Hyperparameter tuning results for Deepr. The columns are various hyperparameters and the rows are different runs. The bold items are best performing.

Table S5: This table shows the Hyperparameter tuning results for RETAIN. The columns are various hyperparameters and the rows are different runs. The bold items are best performing.

Table S6: This table shows the individual, disease wise precision for BEHRT for the next 6 months prediction task. The ratio in column 5 means the occurrence of a particular disease code in the label of the task over all labels in test data.

Figure S1: This figure shows the graph for an understanding of APS and AUROC for the next 6 months prediction task for all three models denoted by colour of dot.

Table S7: This table shows the number of Male patient Predictions and Female patient Predictions with predictive probability above 0.5 for a gender-specific disease in the next 6 months prediction test dataset. Disease Gender represents whether a disease is a male or female specific disease and M and F implies Male and Female respectively.

Table S8: This table shows the performance of the ablation study conducted on the next 6 Months prediction task. By turning on and off various embeddings, we measure performance with Average Precision Score (APS) and Area Under the ROC Curve (AUROC).

## Population Statistics

Table S1: Statistics of Cohorts Selected Prediction Tasks

| Characteristics  |               | Next Visit | Next 6 M | Next 12M |
|------------------|---------------|------------|----------|----------|
| Gender           | Male          | 41.80%     | 42.30%   | 41.70%   |
|                  | Female        | 58.20%     | 57.70%   | 58.30%   |
| Ethnicity        | White         | 46.40%     | 48.30%   | 47.40%   |
|                  | Unknown       | 43.80%     | 44.00%   | 44.50%   |
|                  | Indian        | 0.40%      | 0.50%    | 0.50%    |
|                  | Other         | 0.30%      | 0.30%    | 0.30%    |
|                  | Pakistani     | 0.20%      | 0.30%    | 0.20%    |
|                  | Black Carib   | 0.20%      | 0.30%    | 0.20%    |
|                  | Other Asian   | 0.10%      | 0.10%    | 0.10%    |
|                  | Black African | 0.10%      | 0.10%    | 0.10%    |
|                  | Mixed         | 0.10%      | 0.10%    | 0.10%    |
|                  | Bangladeshi   | 0.08%      | 0.07%    | 0.07%    |
| Age Start        | Black Other   | 0.07%      | 0.06%    | 0.06%    |
|                  | Chinese       | 0.06%      | 0.06%    | 0.05%    |
|                  | 0.25 Quantile | 45         | 46       | 46       |
|                  | 0.5 Quantile  | 58         | 60       | 59       |
|                  | 0.75 Quantile | 70         | 71       | 70       |
| Age End          | 0.25 Quantile | 56         | 58       | 58       |
|                  | 0.5 Quantile  | 70         | 71       | 71       |
|                  | 0.75 Quantile | 81         | 82       | 82       |
| Unique Codes     | 0.25 Quantile | 7          | 8        | 8        |
|                  | 0.5 Quantile  | 9          | 10       | 11       |
|                  | 0.75 Quantile | 12         | 15       | 15       |
| Number of Visits | 0.25 Quantile | 10         | 14       | 14       |
|                  | 0.5 Quantile  | 15         | 20       | 20       |
|                  | 0.75 Quantile | 24         | 30       | 30       |

Age Start and Age End: Corresponding age for the first visit and last visit been recorded

## Hyperparameter Tuning for MLM

In this section, we show the hyperparameter tuning results. In Table S2, we show the model's performance during the process of training the MLM. We performed Bayesian Optimisation to search for optimal parameters for the model.

**Table S2.** MLM Hyperparameter Tuning

| Iteration | Hidden Size | Layers   | Attention Heads | Intermediate Size | Precision     |
|-----------|-------------|----------|-----------------|-------------------|---------------|
| 1         | 216         | 3        | 6               | 256               | 0.6191        |
| 2         | 288         | 9        | 12              | 512               | 0.6399        |
| 3         | 216         | 3        | 12              | 512               | 0.6175        |
| 4         | 432         | 3        | 18              | 512               | 0.6397        |
| 5         | 288         | 6        | 6               | 784               | 0.6380        |
| 6         | 216         | 6        | 18              | 512               | 0.6262        |
| 7         | 288         | 3        | 18              | 512               | 0.6292        |
| 8         | 432         | 3        | 6               | 784               | 0.6426        |
| 9         | 288         | 6        | 12              | 512               | 0.6356        |
| 10        | 288         | 3        | 12              | 256               | 0.6283        |
| 11        | 432         | 9        | 18              | 512               | 0.6466        |
| 12        | 576         | 9        | 6               | 1024              | 0.6538        |
| 13        | 432         | 3        | 18              | 1024              | 0.6411        |
| 14        | 432         | 9        | 6               | 1024              | 0.6508        |
| 15        | 576         | 6        | 6               | 256               | 0.6503        |
| 16        | 576         | 6        | 12              | 256               | 0.6510        |
| 17        | 360         | 9        | 18              | 512               | 0.6404        |
| 18        | 576         | 9        | 6               | 512               | 0.6513        |
| 19        | 288         | 6        | 6               | 512               | 0.6363        |
| 20        | 288         | 3        | 6               | 512               | 0.6297        |
| <b>21</b> | <b>288</b>  | <b>6</b> | <b>12</b>       | <b>512</b>        | <b>0.6597</b> |
| 22        | 576         | 3        | 12              | 512               | 0.6487        |
| 23        | 360         | 6        | 6               | 784               | 0.6412        |
| 24        | 432         | 9        | 6               | 512               | 0.6497        |
| 25        | 360         | 6        | 12              | 512               | 0.6423        |

# Medical Evaluation of Associations

Table S3 shows the medical evaluation of our diseases associations based on highest cosine similarity. Each row is a disease and the columns are the ten diseases associated to said disease. The annotation “Good” means that the medical validator defined the association as a medically valid association and “Not Good” means that the medical validator defined the association as medically invalid.

Table S3: Medical Validation of Disease Associations based on Disease Embeddings

| Disease                           | 1                                    | 2                               | 3                                           | 4                                | 5                                         | 6                                     | 7                                       | 8                                           | 9                                                | 10                                                       |
|-----------------------------------|--------------------------------------|---------------------------------|---------------------------------------------|----------------------------------|-------------------------------------------|---------------------------------------|-----------------------------------------|---------------------------------------------|--------------------------------------------------|----------------------------------------------------------|
| 1 Postcoital and contact bleeding | Postcoital and contact bleeding-Good | Carcinoma in situ cervical-Good | Dysmenorrhoea-Not Good                      | Leiomyoma of uterus-Good         | Endometriosis-Good                        | Primary Malignancy Cervical-Good      | Menorrhagia and polymenorrhoea-Not Good | Prematurity-Not Good                        | Polycystic ovarian syndrome-Good                 | Endometrial hyperplasia and hypertrophy-Good             |
| 2 Cholecystitis                   | Cholecystitis-Good                   | Cholelithiasis-Good             | Cholangitis-Good                            | Pancreatitis-Good                | Appendicitis-Not Good                     | Diaphragmatic hernia-Not Good         | Infection of liver-Good                 | Fatty Liver-Good                            | Benign neoplasm of stomach and duodenum-Not Good | Supraventricular tachycardia-Not Good                    |
| 3 Acute Kidney Injury             | Acute Kidney Injury-Good             | Right bundle branch block-Good  | Pulmonary collapse (excl pneumothorax)-Good | Urinary Tract Infections-Good    | Atrioventricular block, first degree-Good | Atrioventricular block, complete-Good | Lower Respiratory Tract Infections-Good | Pericardial effusion (noninflammatory)-Good | Trifascicular block-Good                         | Secondary Malignancy retroperitoneum and peritoneum-Good |
| 4 Benign neoplasm of ovary        | Benign neoplasm of ovary-Good        | Endometriosis-Good              | Benign neoplasm and polyp of uterus-Good    | hyperplasia and hypertrophy-Good | Leiomyoma of uterus-Good                  | Dysmenorrhoea-Good                    | Primary Malignancy Uterine-Good         | Postmenopausal bleeding-Good                | Primary Malignancy Cervical-Good                 | Polycystic ovarian syndrome-Good                         |

|   |                                 |                                      |                               |                                  |                                  |                                                |                                                                                    |                                                   |                                                                             |                                         |                                                                             |
|---|---------------------------------|--------------------------------------|-------------------------------|----------------------------------|----------------------------------|------------------------------------------------|------------------------------------------------------------------------------------|---------------------------------------------------|-----------------------------------------------------------------------------|-----------------------------------------|-----------------------------------------------------------------------------|
|   |                                 |                                      |                               |                                  |                                  |                                                |                                                                                    |                                                   | Delirium, not induced by alcohol and other psychoactive substances-Not Good | Anterior and Intermediate Uveitis-Good  | Cataract-Good                                                               |
| 5 | Visual impairment and blindness | Visual impairment and blindness-Good | Macular degeneration-Good     | Retinal vascular occlusions-Good | Retinal detachment-Good          | Keratitis-Good                                 | Posterior Uveitis-Good                                                             | Glaucoma-Good                                     |                                                                             |                                         |                                                                             |
|   |                                 |                                      |                               |                                  |                                  |                                                | Peripheral neuropathies (excluding cranial nerve and carpal tunnel syndromes)-Good | Postinfective and reactive arthropathies-Not Good | Alopecia areata-Not Good                                                    | Infection of bones and joints-Not Good  | Disorders of autonomic nervous system-Good                                  |
| 6 | Intervertebral disc disorders   | Intervertebral disc disorders-Good   | Spondylolisthesis-Good        | Spinal stenosis-Good             | Spondylosis-Good                 | Scoliosis-Not Good                             | Benign neoplasm of stomach and oesophageal ulcer-Good                              | Appendicitis-Good                                 | Barrett's oesophagus-Good                                                   | Infections of the digestive system-Good | Cholelithiasis-Not Good                                                     |
| 7 | Peptic ulcer disease            | Peptic ulcer disease-Good            | Gastritis and duodenitis-Good | Diaphragmatic hernia-Not Good    | Peritonitis-Good                 | Disorders of autonomic nervous system-Not Good |                                                                                    |                                                   |                                                                             |                                         |                                                                             |
|   |                                 |                                      |                               |                                  |                                  |                                                | Primary Malignancy                                                                 | Primary Malignancy                                | Primary or Idiopathic Thrombocytopenia-Not Good                             |                                         | Subdural haematoma - nontraumatic-Not Good                                  |
| 8 | Fibromatoses                    | Fibromatoses-Good                    | Retinal detachment-Good       | Primary Malignant Melanoma-Good  | Benign essential tremor-Not Good | Good                                           | Hyposplenism-Good                                                                  | Other Skin and subcutaneous tissue-Good           | Good                                                                        | Nasal polyp-Good                        | Delirium, not induced by alcohol and other psychoactive substances-Not Good |
|   |                                 |                                      |                               |                                  |                                  |                                                |                                                                                    |                                                   | Primary pulmonary hypertension-Not Good                                     | Menieres disease-Good                   | Good                                                                        |
| 9 | Fracture of wrist               | Fracture of wrist-Good               | Osteoporosis-Good             | Fracture of hip-Good             | Scoliosis-Not Good               | Collapsed vertebra-Good                        | Fibromatoses-Good                                                                  | Carpal tunnel syndrome-Good                       |                                                                             |                                         |                                                                             |

|    |                                                                               |                                                                                    |                                             |                                            |                                    |                                                                |                                       |                                                                |                                                                         |                                          |                                                                  |
|----|-------------------------------------------------------------------------------|------------------------------------------------------------------------------------|---------------------------------------------|--------------------------------------------|------------------------------------|----------------------------------------------------------------|---------------------------------------|----------------------------------------------------------------|-------------------------------------------------------------------------|------------------------------------------|------------------------------------------------------------------|
|    |                                                                               |                                                                                    |                                             |                                            |                                    |                                                                |                                       |                                                                | Delirium, not induced by alcohol and other psychoactive substances-Good |                                          | Syndrome of inappropriate secretion of antidiuretic hormone-Good |
| 10 | Ischaemic stroke                                                              | Ischaemic stroke-Good                                                              | Intracerebral haemorrhage-Good              | Stroke Not otherwise specified (NOS)-Good  | Transient ischaemic attack-Good    | Aspiration pneumonitis-Good                                    | Subarachnoid haemorrhage-Good         | Subdural haematoma - nontraumatic-Good                         | Primary                                                                 | Bell's palsy-Not Good                    |                                                                  |
|    |                                                                               |                                                                                    |                                             |                                            |                                    |                                                                |                                       |                                                                | Primary                                                                 | Primary                                  |                                                                  |
|    |                                                                               |                                                                                    |                                             |                                            |                                    |                                                                |                                       |                                                                | Malignancy                                                              | Malignancy                               | Primary                                                          |
| 11 | Primary Malignancy Breast                                                     | Primary Malignancy Breast-Good                                                     | Primary Malignancy Uterine-Good             | Postmenopausal bleeding-Good               | Primary Malignancy Cervical-Good   | Secondary Malignancy Other organs-Good                         | Secondary Malignancy Lymph Nodes-Good | Benign neoplasm and polyp of uterus-Not Good                   | Lung and trachea-Not Good                                               | Malignant Melanoma-Not Good              | Primary Malignancy Thyroid-Not Good                              |
|    |                                                                               |                                                                                    |                                             |                                            |                                    |                                                                |                                       |                                                                |                                                                         |                                          |                                                                  |
|    |                                                                               |                                                                                    |                                             |                                            |                                    |                                                                |                                       |                                                                |                                                                         |                                          |                                                                  |
| 12 | Pleural effusion                                                              | Pleural effusion-Good                                                              | Pericardial effusion (noninflammatory)-Good | Pulmonary pneumothorax)-Good               | Secondary Malignancy Pleura-Good   | Infections of Other or unspecified organs-Good                 | Secondary pulmonary hypertension-Good | Primary pulmonary hypertension-Good                            | Atrial Fibrillation and flutter-Not Good                                | Primary Malignancy                       | Other Organs-Good                                                |
|    |                                                                               |                                                                                    |                                             |                                            |                                    |                                                                |                                       |                                                                |                                                                         |                                          |                                                                  |
|    |                                                                               |                                                                                    |                                             |                                            |                                    |                                                                |                                       |                                                                |                                                                         |                                          |                                                                  |
| 13 | Peripheral neuropathies (excluding cranial nerve and carpal tunnel syndromes) | Peripheral neuropathies (excluding cranial nerve and carpal tunnel syndromes)-Good | Diabetic neurological complications-Good    | Disorders of autonomic nervous system-Good | Intervertebral disc disorders-Good | Carpal tunnel syndrome-Not Good                                | Spinal stenosis-Good                  | Postviral fatigue syndrome, neurasthenia and fibromyalgia-Good | Erectile dysfunction-Good                                               | Peripheral arterial disease-Good         | Spondylolisthesis-Good                                           |
|    |                                                                               |                                                                                    |                                             |                                            |                                    |                                                                |                                       |                                                                |                                                                         |                                          |                                                                  |
|    |                                                                               |                                                                                    |                                             |                                            |                                    |                                                                |                                       |                                                                |                                                                         |                                          |                                                                  |
| 14 | Anal fissure                                                                  | Anal fissure-Good                                                                  | Anorectal fistula-Not Good                  | Pilonidal cyst-Not Good                    | Irritable bowel syndrome-Good      | Benign neoplasm of colon, rectum, anus and anal canal-Not Good | Ulcerative colitis-Good               | Haemangioma (any site)-Not Good                                | Alopecia areata-Not Good                                                | Postcoital and contact bleeding-Not Good | Vitiligo-Good                                                    |



|    |                             |                                  |                                |                                                  |                                                     |                                          |                                          |                                              |                                                                                                        |                                                                |                                                     |
|----|-----------------------------|----------------------------------|--------------------------------|--------------------------------------------------|-----------------------------------------------------|------------------------------------------|------------------------------------------|----------------------------------------------|--------------------------------------------------------------------------------------------------------|----------------------------------------------------------------|-----------------------------------------------------|
| 21 | Dysmenorrhoea               | Dysmenorrhoea-Good               | Endometriosis-Good             | Leiomyoma of uterus-Good                         | Menorrhagia and polymenorrhoea-Not Good             | Postcoital and contact bleeding-Not Good | Carcinoma in situ cervical-Not Good      | Endometrial hyperplasia and hypertrophy-Good | Polycystic ovarian syndrome-Good                                                                       | Prematurity-Not Good                                           | Female pelvic inflammatory disease-Good             |
| 22 | Cholelithiasis              | Cholelithiasis-Good              | Cholecystitis-Good             | Cholangitis-Good                                 | Pancreatitis-Good                                   | Gastritis and duodenitis-Not Good        | Scleritis and episcleritis-Not Good      | Appendicitis-Not Good                        | Diaphragmatic hernia-Not Good                                                                          | Peptic ulcer disease-Not Good                                  | Obesity-Good                                        |
| 23 | Primary Malignancy Prostate | Primary Malignancy Prostate-Good | Secondary Malignancy Bone-Good | Primary Malignancy Bladder-Good                  | Hyperplasia of prostate-Good                        | Secondary Malignancy Other organs-Good   | Obstructive and reflux uropathy-Not Good | Erectile dysfunction-Good                    | Asbestosis-Good                                                                                        | Liver and intrahepatic bile duct-Good                          | Hyposplenism-Good                                   |
| 24 | Myocardial Infarction       | Myocardial Infarction-Good       | Unstable Angina-Good           | Stable Angina-Good                               | Coronary heart disease not otherwise specified-Good | Left bundle branch block-Good            | Heart failure-Good                       | Atrioventricular block, second degree-Good   | Ventricular tachycardia-Good                                                                           | Atrioventricular block, first degree-Good                      | Atrioventricular block, complete-Good               |
| 25 | Peripheral arterial disease | Peripheral arterial disease-Good | Abdominal Aortic Aneurysm-Good | Diabetic neurological complications-Good         | Unstable Angina-Good                                | Retinal vascular occlusions-Good         | Transient ischaemic attack-Good          | Stable Angina-Good                           | Type 1 Diabetes Mellitus, Type 2 Diabetes Mellitus, and Diabetes Mellitus, other or not specified-Good | Visual impairment and blindness-Good                           | Coronary heart disease not otherwise specified-Good |
| 26 | Diaphragmatic hernia        | Diaphragmatic hernia-Good        | Gastritis and duodenitis-Good  | Benign neoplasm of stomach and duodenum-Not Good | Gastro-oesophageal reflux disease-Good              | Barrett's oesophagus-Good                | Peptic ulcer disease-Good                | Oesophagitis and oesophageal ulcer-Good      | Diverticular disease of intestine (acute and chronic)-Not Good                                         | Benign neoplasm of colon, rectum, anus and anal canal-Not Good | Cholelithiasis-Not Good                             |



|    |                                    |                                         |                                                     |                                           |                                                                 |                                   |                                                                               |                                             |                                        |                                                                         |                                                                                        |
|----|------------------------------------|-----------------------------------------|-----------------------------------------------------|-------------------------------------------|-----------------------------------------------------------------|-----------------------------------|-------------------------------------------------------------------------------|---------------------------------------------|----------------------------------------|-------------------------------------------------------------------------|----------------------------------------------------------------------------------------|
| 27 | Urolithiasis                       | Urolithiasis-Good                       | Obstructive and reflux uropathy-Good                | Tubulointerstitial nephritis-Not Good     | Hyperplasia of prostate-Good                                    | Appendicitis-Not Good             | Non-acute cystitis-Good                                                       | Primary Malignancy Bladder-Good             | Pancreatitis-Good                      | Bell's palsy-Not Good                                                   | Cholecystitis-Not Good                                                                 |
| 28 | Glaucoma                           | Glaucoma-Good                           | Retinal vascular occlusions-Good                    | Visual impairment and blindness-Good      | Macular degeneration-Good                                       | Cataract-Good                     | Anterior and Intermediate Uveitis-Good                                        | Keratitis-Good                              | Diabetic ophthalmic complications-Good | Parkinson's disease-Good                                                | End stage renal disease-Good                                                           |
| 29 | Urinary Tract Infections           | Urinary Tract Infections-Good           | Ear and Upper Respiratory Tract Infections-Not Good | Infections of the digestive system-Good   | Female pelvic inflammatory disease-Good                         | Tract Infections-Good             | Lower Respiratory Infection of other or unspecified genitourinary system-Good | Infection of male genital system-Good       | Acute Kidney Injury-Good               | Infection of subcutaneous tissues-Not Good                              | Infection of bones and joints-Good                                                     |
| 30 | Tinnitus                           | Tinnitus-Good                           | Hearing loss-Good                                   | Menieres disease-Good                     | Raynaud's syndrome-Good                                         | Haemangioma (any site)-Good       | Seborrheic dermatitis-Not Good                                                | Primary Malignancy Melanoma-Good            | Irritable bowel syndrome-Not Good      | Chronic sinusitis-Good                                                  | Peripheral neuropathies (excluding cranial nerve and carpal tunnel syndromes)-Not Good |
| 31 | Lower Respiratory Tract Infections | Lower Respiratory Tract Infections-Good | Infections of the Heart-Not Good                    | Infection of liver-Good                   | Infection of other or unspecified genitourinary system-Not Good | Urinary Tract Infections-Not Good | Ear and Upper Respiratory Tract Infections-Good                               | Infections of the digestive system-Not Good | Infection of bones and joints-Not Good | Infection of male genital system-Not Good                               | Agranulocytosis-Good                                                                   |
| 32 | Transient ischaemic attack         | Transient ischaemic attack-Good         | Ischaemic stroke-Good                               | Stroke Not otherwise specified (NOS)-Good | Intracerebral haemorrhage-Good                                  | Retinal vascular occlusions-Good  | Subarachnoid haemorrhage-Not Good                                             | Bell's palsy-Not Good                       | Peripheral arterial disease-Good       | Delirium, not induced by alcohol and other psychoactive substances-Good | Nonrheumatic aortic valve disorders-Good                                               |

|    |                                            |                                                 |                                                            |                                                                    |                                                            |                                           |                                      |                                      |                                   |                                  |                                                |
|----|--------------------------------------------|-------------------------------------------------|------------------------------------------------------------|--------------------------------------------------------------------|------------------------------------------------------------|-------------------------------------------|--------------------------------------|--------------------------------------|-----------------------------------|----------------------------------|------------------------------------------------|
| 33 | Bacterial Diseases (excl TB)               | Bacterial Diseases (excl TB)-Good               | Other or unspecified infectious organisms-Good             | Viral diseases (excl chronic hepatitis/HIV)-Not Good               | Parasitic infections-Not Good                              | Tubulo-interstitial nephritis-Good        | Female infertility-Good              | Obstructive and reflux uropathy-Good | Acute Kidney Injury-Good          | Aspiration pneumonitis-Good      | Infections of Other or unspecified organs-Good |
| 34 | Polymyalgia Rheumatica                     | Polymyalgia Rheumatica-Good                     | Giant Cell arteritis-Good                                  | Monoclonal gammopathy of undetermined significance (MGUS)-Not Good | Rheumatoid Arthritis-Not Good                              | Collapsed vertebra-Good                   | Spinal stenosis-Good                 | Epilepsy-Good                        | Spondylolisthesis-Good            | Menieres disease-Good            | Nonrheumatic aortic valve disorders-Good       |
| 35 | Primary Other Skin and subcutaneous tissue | Primary Other Skin and subcutaneous tissue-Good | Primary Malignancy Other Skin and subcutaneous tissue-Good | Primary Malignancy Actinic keratosis-Good                          | Primary Malignant Melanoma-Good                            | Primary Malignancy Oropharyngeal-Not Good | Primary Malignancy Fibromatoses-Good | Primary Rosacea-Not Good             | Seborrheic dermatitis-Not Good    | Hyperplasia of prostate-Not Good | Gout-Good                                      |
| 36 | Urticaria                                  | Urticaria-Good                                  | Dermatitis (atopc/contact /other/unspecified)-Good         | Seborrheic dermatitis-Not Good                                     | Keratitis-Good                                             | Chronic sinusitis-Good                    | Lichen planus-Not Good               | Hidradenitis suppurativa-Not Good    | Benign neoplasm of ovary-Not Good | Alopecia areata-Good             | Raynaud's syndrome-Not Good                    |
| 37 | Actinic keratosis                          | Actinic keratosis-Good                          | Primary Malignancy Other Skin and subcutaneous tissue-Good | Primary Malignant Melanoma-Good                                    | Haemangioma (any site)-Not Good                            | Hearing loss-Not Good                     | Osteoarthritis (excl spine)-Good     | Fibromatoses-Not Good                | Seborrheic dermatitis-Good        | Rosacea-Good                     | Enthesopathies & synovial disorders-Not Good   |
| 38 | Rosacea                                    | Rosacea-Good                                    | Acne-Not Good                                              | Seborrheic dermatitis-Good                                         | Primary Malignancy Other Skin and subcutaneous tissue-Good | Ulcerative colitis-Good                   | Migraine-Good                        | Actinic keratosis-Good               | Vitiligo-Not Good                 | Urticaria-Not Good               | Female genital prolapse-Not Good               |

|    |                                                       |                                                            |                                                         |                                  |                                                                                        |                                         |                                         |                                          |                                                  |                                                                |                                                |
|----|-------------------------------------------------------|------------------------------------------------------------|---------------------------------------------------------|----------------------------------|----------------------------------------------------------------------------------------|-----------------------------------------|-----------------------------------------|------------------------------------------|--------------------------------------------------|----------------------------------------------------------------|------------------------------------------------|
| 39 | Osteoporosis                                          | Osteoporosis-Good                                          | Collapsed vertebra-Good                                 | Fracture of wrist-Good           | Fracture of hip-Good                                                                   | Scoliosis-Good                          | Primary Malignancy Breast-Good          | Spondylosis-Good                         | Cataract-Good                                    | Osteoarthritis (excl spine)-Not Good                           | Hyperparathyroidism-Good                       |
| 40 | Gastritis and duodenitis                              | Gastritis and duodenitis-Good                              | Diaphragmatic hernia-Not Good                           | Peptic ulcer disease-Good        | Gastro-oesophageal reflux disease-Good                                                 | neoplasm of stomach and duodenum-Good   | Oesophagitis and oesophageal ulcer-Good | Irritable bowel syndrome-Good            | Cholelithiasis-Not Good                          | Iron deficiency anaemia-Good                                   | Infections of Other or unspecified organs-Good |
| 41 | Diverticular disease of intestine (acute and chronic) | Diverticular disease of intestine (acute and chronic)-Good | neoplasm of colon, rectum, anus and anal canal-Not Good | Peritonitis-Good                 | Irritable bowel syndrome-Not Good                                                      | Abdominal Aortic Aneurysm-Good          | Diaphragmatic hernia-Not Good           | Anorectal prolapse-Not Good              | Benign neoplasm of stomach and duodenum-Not Good | Osteoarthritis (excl spine)-Not Good                           | Gastritis and duodenitis-Not Good              |
| 42 | Carpal tunnel syndrome                                | Carpal tunnel syndrome-Good                                | Enthesopathies & synovial disorders-Good                | Spondylosis-Not Good             | Peripheral neuropathies (excluding cranial nerve and carpal tunnel syndromes)-Not Good | Menorrhagia and polymenorrhoea-Not Good | Intervertebral disc disorders-Not Good  | Osteoarthritis (excl spine)-Good         | Fracture of wrist-Good                           | Obesity-Good                                                   | Fibromatoses-Not Good                          |
| 43 | Seborrheic dermatitis                                 | Seborrheic dermatitis-Good                                 | Dermatitis (atopc/contact /other/unspecified)-Not Good  | Rosacea-Not Good                 | Psoriasis-Not Good                                                                     | Urticaria-Not Good                      | Acne-Not Good                           | Chronic sinusitis-Not Good               | Tinnitus-Not Good                                | Primary Malignancy Other Skin and subcutaneous tissue-Not Good | Enthesopathies & synovial disorders-Not Good   |
| 44 | Spondylosis                                           | Spondylosis-Good                                           | Intervertebral disc disorders-Good                      | Osteoarthritis (excl spine)-Good | Spinal stenosis-Good                                                                   | Carpal tunnel syndrome-Not Good         | Spondylolisthesis-Good                  | Enthesopathies & synovial disorders-Good | Osteoporosis-Good                                | Transient ischaemic attack-Not Good                            | Diaphragmatic hernia-Not Good                  |

|    |                                           |                                     |                                           |                                                  |                                                |                                     |                                           |                                                    |                                              |                                                                |                                                                |
|----|-------------------------------------------|-------------------------------------|-------------------------------------------|--------------------------------------------------|------------------------------------------------|-------------------------------------|-------------------------------------------|----------------------------------------------------|----------------------------------------------|----------------------------------------------------------------|----------------------------------------------------------------|
| 45 | Other or unspecified infectious organisms | Other or unspecified organisms-Good | Bacterial Diseases (excl TB)-Good         | Viral diseases (excl chronic hepatitis/HIV)-Good | Infections of Other or unspecified organs-Good | Aspiration pneumonia-Good           | Pleural effusion-Good                     | Mycoses-Good                                       | Parasitic infections-Good                    | Pulmonary collapse (excl pneumothorax)-Good                    | Acute Kidney Injury-Good                                       |
| 46 | Vitamin B12 deficiency anaemia            | Vitamin B12 deficiency anaemia-Good | Folate deficiency anaemia-Good            | Iron deficiency anaemia-Not Good                 | Other anaemias-Not Good                        | Coeliac disease-Good                | Myelodysplastic syndromes-Good            | Dementia-Good                                      | Vitiligo-Good                                | Rheumatoid Arthritis-Good                                      | Psoriasis-Good                                                 |
| 47 | Hyperplasia of prostate                   | Hyperplasia of prostate-Good        | Primary Malignancy Prostate-Not Good      | Primary Malignancy Bladder-Not Good              | Erectile dysfunction-Not Good                  | Urolithiasis-Good                   | Hydrocoele (incl infected)-Not Good       | Right bundle branch block-Good                     | Abdominal Hernia-Not Good                    | Primary Malignancy Other Skin and subcutaneous tissue-Not Good | Diverticular disease of intestine (acute and chronic)-Not Good |
| 48 | Iron deficiency anaemia                   | Iron deficiency anaemia-Good        | Other anaemias-Not Good                   | Folate deficiency anaemia-Not Good               | Vitamin B12 deficiency anaemia-Not Good        | Menorrhagia and polymenorrhoea-Good | Gastritis and duodenitis-Good             | Leiomyoma of uterus-Good                           | Benign neoplasm of stomach and duodenum-Good | Peptic ulcer disease-Good                                      | Anxiety disorders-Good                                         |
| 49 | Female genital prolapse                   | Female genital prolapse-Good        | Anorectal prolapse-Good                   | Postmenopausal bleeding-Good                     | Benign neoplasm and polyp of uterus-Good       | Urinary Incontinence-Good           | Neuromuscular dysfunction of bladder-Good | Postcoital and contact bleeding-Good               | Sjogren's disease-Not Good                   | Leiomyoma of uterus-Good                                       | Primary Malignancy Breast-Not Good                             |
| 50 | Urinary Incontinence                      | Urinary Incontinence-Good           | Neuromuscular dysfunction of bladder-Good | Female genital prolapse-Good                     | Hearing loss-Good                              | Depression-Good                     | Osteoarthritis (excl spine)-Good          | Allergic and chronic rhinitis-Good                 | Dementia-Good                                | Enthesopathies & synovial disorders-Not Good                   | Obesity-Good                                                   |
| 51 | Other anaemias                            | Other anaemias-Good                 | Iron deficiency anaemia-Good              | Folate deficiency anaemia-Good                   | Depression-Good                                | Vitamin B12 deficiency anaemia-Good | Oesophagitis and oesophageal ulcer-Good   | Dermatitis (atopc/contact /other/unspecified)-Good | Peptic ulcer disease-Good                    | Heart failure-Good                                             | Primary Malignancy colorectal and anus-Good                    |

|    |                                                 |                                                    |                                                                                                                                   |                                                                               |                                                    |                                                    |                                                    |                                                    |                                                              |                                                    |                                                                                                                                                 |
|----|-------------------------------------------------|----------------------------------------------------|-----------------------------------------------------------------------------------------------------------------------------------|-------------------------------------------------------------------------------|----------------------------------------------------|----------------------------------------------------|----------------------------------------------------|----------------------------------------------------|--------------------------------------------------------------|----------------------------------------------------|-------------------------------------------------------------------------------------------------------------------------------------------------|
|    |                                                 |                                                    | Type 1<br>Diabetes<br>Mellitus, Type<br>2 Diabetes<br>Mellitus, and<br>Diabetes<br>Mellitus, Äi<br>other or not<br>specified-Good | Macular<br>degeneration-<br>Good                                              | Erectile<br>dysfunction-<br>Good                   | Retinal<br>vascular<br>occlusions-<br>Good         | Visual<br>impairment<br>and blindness-<br>Good     | Glaucoma-<br>Good                                  | Obesity-Good                                                 | Retinal<br>detachment-<br>Good                     |                                                                                                                                                 |
| 52 | Diabetic<br>ophthalmic<br>complications<br>Good | Diabetic<br>ophthalmic<br>complications-<br>Good   | Diabetic<br>neurological<br>complications-<br>Good                                                                                | Diabetic<br>neurological<br>complications-<br>Good                            | Diabetic<br>neurological<br>complications-<br>Good | Diabetic<br>neurological<br>complications-<br>Good | Diabetic<br>neurological<br>complications-<br>Good | Diabetic<br>neurological<br>complications-<br>Good | Diabetic<br>neurological<br>complications-<br>Good           | Diabetic<br>neurological<br>complications-<br>Good |                                                                                                                                                 |
| 53 | Heart failure<br>Good                           | Heart failure-<br>Good                             | Other<br>Cardiomyopat<br>hy-Good                                                                                                  | Nonrheumatic<br>mitral valve<br>disorders-Good                                | Left bundle<br>branch block-<br>Good               | Myocardial<br>Infarction-<br>Good                  | Nonrheumatic<br>aortic valve<br>disorders-Good     | Dilated<br>cardiomyopath<br>y-Good                 | Coronary heart<br>disease not<br>otherwise<br>specified-Good | Atrioventricula<br>r block,<br>complete-<br>Good   | Primary<br>pulmonary<br>hypertension-<br>Not Good<br>Delirium, not<br>induced by<br>alcohol and<br>other<br>psychoactive<br>substances-<br>Good |
| 54 | Stroke Not<br>otherwise<br>specified<br>(NOS)   | Stroke Not<br>otherwise<br>specified<br>(NOS)-Good | Ischaemic<br>stroke-Good                                                                                                          | Transient<br>ischaemic<br>attack-Good                                         | Intracerebral<br>haemorrhage-<br>Good              | Aspiration<br>pneumonitis-<br>Good                 | Dementia-<br>Good                                  | Epilepsy-Good                                      | Subarachnoid<br>haemorrhage-<br>Good                         | Heart failure-<br>Good                             | Gastro-<br>oesophageal<br>reflux disease-<br>Not Good                                                                                           |
| 55 | Irritable<br>bowel<br>syndrome                  | Irritable bowel<br>syndrome-<br>Good               | Chronic<br>sinusitis-Good                                                                                                         | Diverticular<br>disease of<br>intestine<br>(acute and<br>chronic)-Not<br>Good | Anxiety<br>disorders-Good                          | Allergic and<br>chronic rhinitis-<br>Good          | Anal fissure-<br>Not Good                          | Migraine-Good                                      | Gastritis and<br>duodenitis-Not<br>Good                      | Dysmenorrhoe<br>a-Good                             | Gastro-<br>oesophageal<br>reflux disease-<br>Not Good                                                                                           |

|    |                                    |                                         |                                                                                                        |                                                            |                                        |                                        |                               |                                                                                    |                                           |                                              |                                         |
|----|------------------------------------|-----------------------------------------|--------------------------------------------------------------------------------------------------------|------------------------------------------------------------|----------------------------------------|----------------------------------------|-------------------------------|------------------------------------------------------------------------------------|-------------------------------------------|----------------------------------------------|-----------------------------------------|
| 56 | Gout                               | Gout-Good                               | Type 1 Diabetes Mellitus, Type 2 Diabetes Mellitus, and Diabetes Mellitus, other or not specified-Good | Primary Malignancy Other Skin and subcutaneous tissue-Good | Osteoarthritis (excl spine)-Good       | Heart failure-Good                     | Glomerulonephritis-Good       | Erectile dysfunction-Good                                                          | Actinic keratosis-Not Good                | Enthesopathies & synovial disorders-Not Good | Fibromatoses-Not Good                   |
| 57 | Oesophagitis and oesophageal ulcer | Oesophagitis and oesophageal ulcer-Good | Diaphragmatic hernia-Not Good                                                                          | Barrett's oesophagus-Good                                  | Gastro-oesophageal reflux disease-Good | Gastritis and duodenitis-Good          | Peptic ulcer disease-Good     | Benign neoplasm of stomach and duodenum-Good                                       | Other anaemias-Good                       | Depression-Good                              | Lower Respiratory Tract Infections-Good |
| 58 | Erectile dysfunction               | Erectile dysfunction-Good               | Type 1 Diabetes Mellitus, Type 2 Diabetes Mellitus, and Diabetes Mellitus, other or not specified-Good | Hyperplasia of prostate-Not Good                           | Primary Malignancy Prostate-Good       | Diabetic ophthalmic complications-Good | Dyslipidaemia-Good            | Peripheral neuropathies (excluding cranial nerve and carpal tunnel syndromes)-Good | Sleep apnoea-Good                         | Fibromatoses-Good                            | Abdominal Hernia-Not Good               |
| 59 | Dementia                           | Dementia-Good                           | Delirium, not induced by alcohol and other psychoactive substances-Not Good                            | Parkinson's disease-Good                                   | Aspiration pneumonitis-Good            | Fracture of hip-Good                   | Left bundle branch block-Good | End stage renal disease-Good                                                       | Stroke Not otherwise specified (NOS)-Good | Ischaemic stroke-Good                        | Intracerebral haemorrhage-Good          |

|    |                                     |                                          |                                              |                                      |                                                              |                                                    |                                                                |                                           |                                |                                              |                                               |
|----|-------------------------------------|------------------------------------------|----------------------------------------------|--------------------------------------|--------------------------------------------------------------|----------------------------------------------------|----------------------------------------------------------------|-------------------------------------------|--------------------------------|----------------------------------------------|-----------------------------------------------|
| 60 | Alcohol Problems                    | Alcohol Problems-Good                    | Liver fibrosis, sclerosis and cirrhosis-Good | Hepatic failure-Good                 | Alcoholic liver disease-Good                                 | Fatty Liver-Good                                   | Other psychoactive substance misuse-Good                       | Portal hypertension-Good                  | Pancreatitis-Good              | Oesophageal varices-Good                     | Personality disorders-Good                    |
| 61 | Other psychoactive substance misuse | Other psychoactive substance misuse-Good | Chronic viral hepatitis-Good                 | Personality disorders-Good           | Schizophrenia, schizotypal and delusional disorders-Not Good | Obsessive-compulsive disorder-Good                 | Anorexia and bulimia nervosa-Not Good                          | Bipolar affective disorder and mania-Good | Alcohol Problems-Good          | Alopecia areata-Not Good                     | Crohn's disease-Not Good                      |
| 62 | Acne                                | Acne-Good                                | Rosacea-Not Good                             | Dysmenorrhoea-Good                   | Postcoital and contact bleeding-Not Good                     | Carcinoma in situ cervical-Not Good                | Polycystic ovarian syndrome-Good                               | Hidradenitis suppurativa-Not Good         | Prematurity-Not Good           | Menorrhagia and polymenorrhoea-Not Good      | Crohn's disease-Good                          |
| 63 | Psoriasis                           | Psoriasis-Good                           | Psoriatic arthropathy-Good                   | Seborrheic dermatitis-Not Good       | Rheumatoid Arthritis-Good                                    | Dermatitis (atopc/contact /other/unspecified)-Good | Obesity-Good                                                   | Hidradenitis suppurativa-Good             | Urticaria-Not Good             | Gastro-oesophageal reflux disease-Not Good   | Bipolar affective disorder and mania-Not Good |
| 64 | Chronic sinusitis                   | Chronic sinusitis-Good                   | Allergic and chronic rhinitis-Good           | Hypertrophy of nasal turbinates-Good | Irritable bowel syndrome-Good                                | Nasal polyp-Good                                   | Asthma-Good                                                    | Migraine-Not Good                         | Seborrheic dermatitis-Not Good | Dysmenorrhoea-Not Good                       | Urticaria-Good                                |
| 65 | Abdominal Hernia                    | Abdominal Hernia-Good                    | Hydrocoele (incl infected)-Good              | Erectile dysfunction-Not Good        | Hyperplasia of prostate-Good                                 | Appendicitis-Not Good                              | Primary Malignancy Other Skin and subcutaneous tissue-Not Good | Hearing loss-Not Good                     | Actinic keratosis-Not Good     | Enthesopathies & synovial disorders-Not Good | Psoriasis-Not Good                            |

|    |                                |                                     |                                                                                                        |                                              |                                      |                                              |                                                        |                                                                    |                                          |                                              |                                        |
|----|--------------------------------|-------------------------------------|--------------------------------------------------------------------------------------------------------|----------------------------------------------|--------------------------------------|----------------------------------------------|--------------------------------------------------------|--------------------------------------------------------------------|------------------------------------------|----------------------------------------------|----------------------------------------|
| 66 | Obesity                        | Obesity-Good                        | Type 1 Diabetes Mellitus, Type 2 Diabetes Mellitus, and Diabetes Mellitus, other or not specified-Good | Sleep apnoea-Good                            | Polycystic ovarian syndrome-Good     | Dyslipidaemia-Good                           | Hidradenitis suppurativa-Good                          | Menorrhagia and polymenorrhoea-Good                                | Diabetic ophthalmic complications-Good   | Allergic and chronic rhinitis-Good           | Osteoarthritis (excl spine)-Good       |
| 67 | Hearing loss                   | Hearing loss-Good                   | Tinnitus-Good                                                                                          | Enthesopathies & synovial disorders-Not Good | Osteoarthritis (excl spine)-Good     | Urinary Incontinence-Good                    | Dermatitis (atopc/contact /other/unspecified)-Not Good | Allergic and chronic rhinitis-Good                                 | Visual impairment and blindness-Not Good | Actinic keratosis-Not Good                   | Seborrheic dermatitis-Good             |
| 68 | Migraine                       | Migraine-Good                       | Menorrhagia and polymenorrhoea-Good                                                                    | Dysmenorrhoea-Good                           | Irritable bowel syndrome-Good        | Chronic sinusitis-Not Good                   | Acne-Good                                              | Postviral fatigue syndrome, neurasthenia and fibromyalgia-Not Good | Asthma-Good                              | Enthesopathies & synovial disorders-Not Good | Allergic and chronic rhinitis-Not Good |
| 69 | Menorrhagia and polymenorrhoea | Menorrhagia and polymenorrhoea-Good | Leiomyoma of uterus-Good                                                                               | Dysmenorrhoea-Good                           | Postcoital and contact bleeding-Good | Endometrial hyperplasia and hypertrophy-Good | Endometriosis-Good                                     | Benign neoplasm and polyp of uterus-Good                           | Carcinoma in situ cervical-Good          | Migraine-Good                                | Benign neoplasm of ovary-Good          |



|    |                                                                                                   |                                                                                                        |                                        |                               |                                                     |                         |                                          |                                        |                                              |                                    |                                           |
|----|---------------------------------------------------------------------------------------------------|--------------------------------------------------------------------------------------------------------|----------------------------------------|-------------------------------|-----------------------------------------------------|-------------------------|------------------------------------------|----------------------------------------|----------------------------------------------|------------------------------------|-------------------------------------------|
|    | Type 1 Diabetes Mellitus, Type 2 Diabetes Mellitus, and Diabetes Mellitus, other or not specified | Type 1 Diabetes Mellitus, Type 2 Diabetes Mellitus, and Diabetes Mellitus, other or not specified-Good | Diabetic ophthalmic complications-Good | Dyslipidaemia-Good            | Erectile dysfunction-Good                           | Obesity-Good            | Diabetic neurological complications-Good | Peripheral arterial disease-Good       | Gout-Good                                    | Hypertension-Good                  | Osteoarthritis (excl spine)-Good          |
| 70 |                                                                                                   |                                                                                                        |                                        |                               |                                                     |                         |                                          |                                        |                                              |                                    |                                           |
| 71 | Cataract                                                                                          | Cataract-Good                                                                                          | Macular degeneration-Good              | Glaucoma-Good                 | Visual impairment and blindness-Good                | Retinal detachment-Good | Anterior and Intermediate Uveitis-Good   | Diabetic ophthalmic complications-Good | Atrial Fibrillation and flutter-Not Good     | Osteoporosis-Good                  | Hearing loss-Good                         |
| 72 | Stable Angina                                                                                     | Stable Angina-Good                                                                                     | Unstable Angina-Good                   | Myocardial Infarction-Good    | Coronary heart disease not otherwise specified-Good | Dyslipidaemia-Good      | Heart failure-Good                       | Peripheral arterial disease-Good       | Nonrheumatic aortic valve disorders-Good     | Transient ischaemic attack-Good    | Left bundle branch block-Good             |
| 73 | Gastro-oesophageal reflux disease                                                                 | Gastro-oesophageal reflux disease-Good                                                                 | Diaphragmatic hernia-Good              | Gastritis and duodenitis-Good | Oesophagitis and oesophageal ulcer-Good             | Anxiety disorders-Good  | Barrett's oesophagus-Good                | Irritable bowel syndrome-Good          | Benign neoplasm of stomach and duodenum-Good | Allergic and chronic rhinitis-Good | Chronic sinusitis-Not Good                |
| 74 | Coronary heart disease not otherwise specified                                                    | Coronary heart disease not otherwise specified-Good                                                    | Myocardial Infarction-Good             | Stable Angina-Good            | Unstable Angina-Good                                | Heart failure-Good      | Atrial Fibrillation and flutter-Good     | Left bundle branch block-Good          | Dyslipidaemia-Good                           | Peripheral arterial disease-Good   | Atrioventricular block, first degree-Good |

|      |                                              |                                                   |                                                                                                        |                                                    |                                             |                                              |                                                     |                                          |                                                                         |                                                              |                                    |
|------|----------------------------------------------|---------------------------------------------------|--------------------------------------------------------------------------------------------------------|----------------------------------------------------|---------------------------------------------|----------------------------------------------|-----------------------------------------------------|------------------------------------------|-------------------------------------------------------------------------|--------------------------------------------------------------|------------------------------------|
| 75   | Chronic obstructive pulmonary disease (COPD) | Chronic obstructive pulmonary disease (COPD)-Good | Asthma-Not Good                                                                                        | Respiratory failure-Good                           | Lower Respiratory Tract Infections-Not Good | Bronchiectasis-Not Good                      | Pneumothorax-Good                                   | Primary Malignancy Lung and trachea-Good | Heart failure-Good                                                      | Other interstitial pulmonary diseases with fibrosis-Not Good | Abdominal Aortic Aneurysm-Good     |
| 76 a | Dyslipidaemia                                | Dyslipidaemia-Good                                | Type 1 Diabetes Mellitus, Type 2 Diabetes Mellitus, and Diabetes Mellitus, other or not specified-Good | Enthesopathies & synovial disorders-Not Good       | Osteoarthritis (excl spine)-Good            | Stable Angina-Good                           | Coronary heart disease not otherwise specified-Good | Obesity-Good                             | Hypertension-Good                                                       | Erectile dysfunction-Good                                    | Allergic and chronic rhinitis-Good |
| 77   | Epilepsy                                     | Epilepsy-Good                                     | Intellectual disability-Good                                                                           | Autism and Asperger's syndrome-Good                | Brain, Other CNS and Intracranial-Good      | Intracerebral haemorrhage-Good               | Stroke Not otherwise specified (NOS)-Not Good       | Aspiration pneumonitis-Good              | Other psychoactive substance misuse-Good                                | Subarachnoid haemorrhage-Good                                | Alcohol Problems-Good              |
| 78   | Hypo or hyperthyroidism                      | Hypo or hyperthyroidism-Good                      | Hypertension-Good                                                                                      | Primary Malignancy Thyroid-Good                    | Atrial Fibrillation and flutter-Good        | Dyslipidaemia-Good                           | Dermatitis (atopc/contact /other/unspecified)-Good  | Osteoarthritis (excl spine)-Not Good     | Benign neoplasm of brain and other parts of central nervous system-Good | Obesity-Good                                                 | Asthma-Good                        |
| 79   | Allergic and chronic rhinitis                | Allergic and chronic rhinitis-Good                | Chronic sinusitis-Good                                                                                 | Dermatitis (atopc/contact /other/unspecified)-Good | Asthma-Good                                 | Enthesopathies & synovial disorders-Not Good | Irritable bowel syndrome-Good                       | Nasal polyp-Good                         | Osteoarthritis (excl spine)-Not Good                                    | Hypertrophy of nasal turbinates-Good                         | Hearing loss-Good                  |

|    |                                               |                                                    |                                                       |                                                        |                                                        |                                                    |                        |                                        |                                              |                                                                |                                              |
|----|-----------------------------------------------|----------------------------------------------------|-------------------------------------------------------|--------------------------------------------------------|--------------------------------------------------------|----------------------------------------------------|------------------------|----------------------------------------|----------------------------------------------|----------------------------------------------------------------|----------------------------------------------|
| 80 | Atrial Fibrillation and flutter               | Atrial Fibrillation and flutter-Good               | Pleural effusion-Not Good                             | Coronary heart disease not otherwise specified-Good    | Supraventricular tachycardia-Good                      | Heart failure-Good                                 | Hypertension-Not Good  | Primary pulmonary hypertension-Good    | Cataract-Good                                | Nonrheumatic mitral valve disorders-Good                       | Nonrheumatic aortic valve disorders-Not Good |
| 81 | Osteoarthritis (excl spine)                   | Osteoarthritis (excl spine)-Good                   | Enthesopathies & synovial disorders-Good              | Spondylosis-Good                                       | Dermatitis (atopc/contact /other/unspecified)-Not Good | Hearing loss-Good                                  | Dyslipidaemia-Good     | Allergic and chronic rhinitis-Not Good | Hypertension-Good                            | Diverticular disease of intestine (acute and chronic)-Not Good | Gastro-oesophageal reflux disease-Good       |
| 82 | Asthma                                        | Asthma-Good                                        | Chronic obstructive pulmonary disease (COPD)-Not Good | Allergic and chronic rhinitis-Good                     | Chronic sinusitis-Good                                 | Dermatitis (atopc/contact /other/unspecified)-Good | Nasal polyps-Good      | Migraine-Good                          | Enthesopathies & synovial disorders-Not Good | Obesity-Good                                                   | Menorrhagia and polymenorrhoea-Not Good      |
| 83 | Anxiety disorders                             | Anxiety disorders-Good                             | Depression-Good                                       | Gastro-oesophageal reflux disease-Good                 | Irritable bowel syndrome-Good                          | Dermatitis (atopc/contact /other/unspecified)-Good | Chronic sinusitis-Good | Allergic and chronic rhinitis-Good     | Iron deficiency anaemia-Good                 | Other psychoactive substance misuse-Good                       | Enthesopathies & synovial disorders-Not Good |
| 84 | Enthesopathies & synovial disorders           | Enthesopathies & synovial disorders-Good           | Osteoarthritis (excl spine)-Good                      | Dermatitis (atopc/contact /other/unspecified)-Not Good | Allergic and chronic rhinitis-Not Good                 | Carpal tunnel syndrome-Not Good                    | Hearing loss-Not Good  | Dyslipidaemia-Good                     | Depression-Not Good                          | Spondylosis-Good                                               | Migraine-Not Good                            |
| 85 | Dermatitis (atopc/contact /other/unspecified) | Dermatitis (atopc/contact /other/unspecified)-Good | Seborrheic dermatitis-Good                            | Enthesopathies & synovial disorders-Not Good           | Allergic and chronic rhinitis-Good                     | Osteoarthritis (excl spine)-Not Good               | Urticaria-Good         | Depression-Good                        | Hypertension-Good                            | Asthma-Good                                                    | Hearing loss-Good                            |
| 86 | Depression                                    | Depression-Good                                    | Anxiety disorders-Good                                | Dermatitis (atopc/contact /other/unspecified)-Good     | Other anaemias-Good                                    | Enthesopathies & synovial disorders-Not Good       | Chronic sinusitis-Good | Irritable bowel syndrome-Good          | Allergic and chronic rhinitis-Good           | Osteoarthritis (excl spine)-Good                               | Urinary Incontinence-Good                    |

|    |              |      |                                                                  |                                                        |                        |                                                                                                                             |                                                 |                     |                                     |                             |
|----|--------------|------|------------------------------------------------------------------|--------------------------------------------------------|------------------------|-----------------------------------------------------------------------------------------------------------------------------|-------------------------------------------------|---------------------|-------------------------------------|-----------------------------|
|    |              |      |                                                                  |                                                        |                        | Type 1<br>Diabetes<br>Mellitus, Type<br>2 Diabetes<br>Mellitus, and<br>Diabetes Mellitus,<br>other or not<br>specified-Good | Enthesopathies & synovial disorders-Not<br>Good | Depression-<br>Good | Hypo or<br>hyperthyroidism-<br>Good | Acute Kidney<br>Injury-Good |
| 87 | Hypertension | Good | Hypertension-<br>(atopic/contact<br>/other/unspecified)-<br>Good | Dermatitis<br>(atopic/contact<br>(excl spine)-<br>Good | Osteoarthritis<br>Good | Atrial<br>Fibrillation and<br>flutter-Good                                                                                  | Dyslipidaemia-<br>Good                          |                     |                                     |                             |

## Hyperparameter Tuning for RETAIN and Deepr

In this section, we performed Bayesian Optimisation to search for optimal parameters for Deepr (Table S4) and RETAIN (Table S5).

**Table S4.** Deepr Best Model for Subsequent Visit Prediction Task

| Iteration | Filters   | Kernel Size | FC I      | FC II     | FC III    | Dropout I     | Dropout II    | Dropout III   | Learning Rate | Average Precision |
|-----------|-----------|-------------|-----------|-----------|-----------|---------------|---------------|---------------|---------------|-------------------|
| 1         | 37        | 7           | 10        | 46        | 28        | 0.4139        | 0.4997        | 0.3718        | 0.0004        | 0.2599            |
| 2         | 24        | 5           | 28        | 19        | 13        | 0.4936        | 0.1722        | 0.4643        | 0.0062        | 0.2319            |
| 3         | 17        | 7           | 16        | 48        | 40        | 0.2250        | 0.3945        | 0.3264        | 0.0310        | 0.1815            |
| 4         | 33        | 7           | 6         | 10        | 25        | 0.1602        | 0.4476        | 0.3544        | 0.0026        | 0.2640            |
| 5         | 32        | 7           | 4         | 30        | 32        | 0.3714        | 0.3382        | 0.3573        | 0.0353        | 0.2005            |
| 6         | 13        | 4           | 50        | 17        | 47        | 0.3424        | 0.1830        | 0.3056        | 0.0008        | 0.3274            |
| 7         | 12        | 3           | 3         | 6         | 43        | 0.4201        | 0.2387        | 0.3884        | 0.0123        | 0.2112            |
| 8         | 30        | 7           | 16        | 26        | 41        | 0.2055        | 0.3343        | 0.1541        | 0.0011        | 0.3256            |
| 9         | 35        | 5           | 50        | 24        | 25        | 0.1567        | 0.4056        | 0.1329        | 0.0004        | 0.3433            |
| 10        | 41        | 7           | 9         | 35        | 19        | 0.4885        | 0.3548        | 0.3080        | 0.0004        | 0.2343            |
| 11        | 4         | 4           | 33        | 12        | 39        | 0.1811        | 0.1251        | 0.1066        | 0.0010        | 0.3051            |
| 12        | 48        | 4           | 36        | 45        | 37        | 0.2143        | 0.3486        | 0.1222        | 0.0015        | 0.3504            |
| 13        | 36        | 3           | 39        | 10        | 48        | 0.1992        | 0.4164        | 0.1183        | 0.0050        | 0.3291            |
| 14        | 45        | 4           | 44        | 40        | 26        | 0.2329        | 0.2900        | 0.1280        | 0.0903        | 0.0042            |
| 15        | 40        | 4           | 35        | 48        | 11        | 0.1600        | 0.4704        | 0.1211        | 0.0019        | 0.3125            |
| <b>16</b> | <b>49</b> | <b>3</b>    | <b>47</b> | <b>41</b> | <b>40</b> | <b>0.1002</b> | <b>0.2541</b> | <b>0.1284</b> | <b>0.0019</b> | <b>0.3588</b>     |
| 17        | 47        | 3           | 50        | 47        | 12        | 0.2519        | 0.2125        | 0.1668        | 0.0005        | 0.2988            |
| 18        | 47        | 3           | 37        | 35        | 50        | 0.1059        | 0.4225        | 0.1120        | 0.0034        | 0.3487            |
| 19        | 47        | 4           | 48        | 34        | 39        | 0.2177        | 0.3607        | 0.1301        | 0.0016        | 0.3567            |
| 20        | 46        | 3           | 46        | 45        | 43        | 0.2007        | 0.1609        | 0.1196        | 0.0044        | 0.3356            |

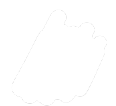

**Table S5.** RETAIN Best Model for Subsequent Visit Prediction Task

| Iteration | Embedding Size | Recurrent Size | Dropout bedding | Em-text | Dropout Con-text | L2            | Average Precision |
|-----------|----------------|----------------|-----------------|---------|------------------|---------------|-------------------|
| 1         | 142            | 90             | 0.3846          |         | 0.0224           | 0.0891        | 0.1822            |
| 2         | 124            | 43             | 0.3922          |         | 0.0382           | 0.0003        | 0.1815            |
| 3         | 173            | 90             | 0.3929          |         | 0.2238           | 0.0014        | 0.3479            |
| 4         | 145            | 91             | 0.4117          |         | 0.0404           | 0.0102        | 0.2049            |
| 5         | 153            | 92             | 0.4569          |         | 0.0642           | 0.0116        | 0.2049            |
| 6         | 120            | 37             | 0.4335          |         | 0.4017           | 0.0728        | 0.1815            |
| 7         | 180            | 102            | 0.3567          |         | 0.3307           | 0.0039        | 0.2469            |
| <b>8</b>  | <b>195</b>     | <b>38</b>      | <b>0.3805</b>   |         | <b>0.2711</b>    | <b>0.0010</b> | <b>0.3740</b>     |
| 9         | 165            | 119            | 0.4969          |         | 0.1964           | 0.0047        | 0.2292            |
| 10        | 174            | 92             | 0.3862          |         | 0.2078           | 0.0019        | 0.3329            |
| 11        | 145            | 110            | 0.3928          |         | 0.1926           | 0.0891        | 0.1813            |
| 12        | 195            | 83             | 0.4418          |         | 0.4787           | 0.0011        | 0.3543            |
| 13        | 187            | 110            | 0.3456          |         | 0.2083           | 0.0123        | 0.2122            |
| 14        | 144            | 80             | 0.3717          |         | 0.0932           | 0.0032        | 0.3038            |
| 15        | 193            | 68             | 0.4528          |         | 0.3950           | 0.0022        | 0.3280            |
| 16        | 198            | 45             | 0.4344          |         | 0.3324           | 0.0442        | 0.1828            |
| 17        | 145            | 64             | 0.4213          |         | 0.1950           | 0.0626        | 0.1813            |
| 18        | 171            | 116            | 0.4166          |         | 0.4950           | 0.0028        | 0.3197            |
| 19        | 186            | 38             | 0.4062          |         | 0.4916           | 0.0011        | 0.3309            |
| 20        | 136            | 54             | 0.3503          |         | 0.1678           | 0.0067        | 0.2162            |

## Disease-wise Model Performance

In this section, we show the disease-wise BEHRT performance in terms of AUROC and APS for the next 6 months prediction task. We have displayed codes with occurrence ratio 0.01 or higher. And detailed below is the description of the Caliber code and the chapter along with the APS/AUROC.

**Table S6.** Diseases Prediction Performance

| Caliber | APS      | AUROC    | Description                  | Ratio    | Caliber Chapter                                                                                     |
|---------|----------|----------|------------------------------|----------|-----------------------------------------------------------------------------------------------------|
| 92      | 0.066765 | 0.723828 | Gastritis and duodenitis     | 0.011198 | Diseases of the digestive system                                                                    |
| 66      | 0.108185 | 0.797633 | Diaphragmatic hernia         | 0.011490 | Diseases of the digestive system                                                                    |
| 100     | 0.118093 | 0.742646 | Hearing loss                 | 0.021964 | Diseases of the ear and mastoid process                                                             |
| 273     | 0.132567 | 0.773249 | Spondylosis                  | 0.013459 | Diseases of the musculoskeletal system and connective tissue                                        |
| 189     | 0.142594 | 0.844596 | Pleural effusion             | 0.010229 | Diseases of the respiratory system                                                                  |
| 172     | 0.162186 | 0.798654 | Other anaemias               | 0.023303 | Diseases of the blood and blood-forming organs and certain disorders involving the immune mechanism |
| 29      | 0.163355 | 0.822707 | Bacterial Diseases (excl TB) | 0.023979 | Certain infectious and parasitic diseases                                                           |
| 130     | 0.167457 | 0.804545 | Iron deficiency anaemia      | 0.020780 | Diseases of the blood and blood-forming organs and certain disorders involving the immune mechanism |
| 295     | 0.169674 | 0.836610 | Urinary Tract Infections     | 0.022534 | Diseases of the genitourinary system                                                                |

**Table S6.** Diseases Prediction Performance

|     |          |          |                                                                                                    |          |                                                              |
|-----|----------|----------|----------------------------------------------------------------------------------------------------|----------|--------------------------------------------------------------|
| 69  | 0.170852 | 0.811759 | Diverticular disease of intestine (acute and chronic)                                              | 0.015966 | Diseases of the digestive system                             |
| 8   | 0.177170 | 0.810068 | Allergic and chronic rhinitis                                                                      | 0.023241 | Diseases of the respiratory system                           |
| 170 | 0.181182 | 0.847938 | Osteoporosis                                                                                       | 0.013982 | Diseases of the musculoskeletal system and connective tissue |
| 71  | 0.184000 | 0.790655 | Dyslipidaemia                                                                                      | 0.026010 | Endocrine, nutritional and metabolic diseases                |
| 168 | 0.184629 | 0.799592 | Oesophagitis and oesophageal ulcer                                                                 | 0.022426 | Diseases of the digestive system                             |
| 217 | 0.203218 | 0.855593 | Primary Malignancy Other Skin and subcutaneous tissue                                              | 0.012013 | Neoplasms                                                    |
| 93  | 0.206455 | 0.776367 | Gastro-oesophageal reflux disease                                                                  | 0.026271 | Diseases of the digestive system                             |
| 290 | 0.208524 | 0.814481 | Type 1 Diabetes Mellitus, Type 2 Diabetes Mellitus, and Diabetes Mellitus – other or not specified | 0.021226 | Endocrine, nutritional and metabolic diseases                |
| 3   | 0.219637 | 0.869366 | Actinic keratosis                                                                                  | 0.012490 | Diseases of the skin and subcutaneous tissue                 |
| 131 | 0.220017 | 0.874319 | Irritable bowel syndrome                                                                           | 0.011182 | Diseases of the digestive system                             |
| 294 | 0.223863 | 0.824114 | Urinary Incontinence                                                                               | 0.020057 | Diseases of the genitourinary system                         |
| 169 | 0.234444 | 0.785766 | Osteoarthritis (excl spine)                                                                        | 0.043714 | Diseases of the musculoskeletal system and connective tissue |
| 176 | 0.245906 | 0.834062 | Other or unspecified infectious organisms                                                          | 0.030963 | Diseases of the respiratory system                           |
| 95  | 0.249208 | 0.894444 | Glaucoma                                                                                           | 0.011367 | Diseases of the eye and adnexa                               |
| 109 | 0.250573 | 0.885547 | Hyperplasia of prostate                                                                            | 0.020842 | Diseases of the genitourinary system                         |
| 184 | 0.264687 | 0.879325 | Peripheral arterial disease                                                                        | 0.010951 | Diseases of the circulatory system                           |
| 79  | 0.265863 | 0.762939 | Enthesopathies & synovial disorders                                                                | 0.047036 | Diseases of the musculoskeletal system and connective tissue |
| 81  | 0.267187 | 0.905812 | Erectile dysfunction                                                                               | 0.017873 | Mental and behavioural disorders                             |
| 140 | 0.268504 | 0.867094 | Lower Respiratory Tract Infections                                                                 | 0.023518 | Certain infectious and parasitic diseases                    |
| 63  | 0.271027 | 0.753816 | Dermatitis (atopc/contact/other/unspecified)                                                       | 0.049051 | Diseases of the skin and subcutaneous tissue                 |
| 142 | 0.292598 | 0.893802 | Macular degeneration                                                                               | 0.010752 | Diseases of the eye and adnexa                               |
| 274 | 0.296798 | 0.889236 | Stable Angina                                                                                      | 0.032039 | Diseases of the circulatory system                           |
| 57  | 0.301041 | 0.900088 | Coronary heart disease not otherwise specified                                                     | 0.035177 | Diseases of the circulatory system                           |
| 275 | 0.307238 | 0.911618 | Stroke Not otherwise specified (NOS)                                                               | 0.023395 | Diseases of the nervous system                               |
| 45  | 0.319433 | 0.863447 | Cataract                                                                                           | 0.042099 | Diseases of the eye and adnexa                               |
| 1   | 0.319972 | 0.845171 | Abdominal Hernia                                                                                   | 0.019180 | Diseases of the digestive system                             |
| 44  | 0.325143 | 0.843480 | Carpal tunnel syndrome                                                                             | 0.012013 | Diseases of the nervous system                               |
| 101 | 0.334902 | 0.912117 | Heart failure                                                                                      | 0.024918 | Diseases of the circulatory system                           |
| 164 | 0.335131 | 0.879670 | Obesity                                                                                            | 0.017442 | Endocrine, nutritional and metabolic diseases                |

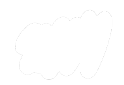

**Table S6.** Diseases Prediction Performance

|     |          |          |                                              |          |                                                                                                     |
|-----|----------|----------|----------------------------------------------|----------|-----------------------------------------------------------------------------------------------------|
| 22  | 0.348523 | 0.885055 | Asthma                                       | 0.026133 | Diseases of the respiratory system                                                                  |
| 97  | 0.349361 | 0.882694 | Gout                                         | 0.018058 | Diseases of the musculoskeletal system and connective tissue                                        |
| 65  | 0.350132 | 0.942604 | Diabetic ophthalmic complications            | 0.018919 | Endocrine, nutritional and metabolic diseases                                                       |
| 147 | 0.368465 | 0.911541 | Migraine                                     | 0.012028 | Diseases of the nervous system                                                                      |
| 229 | 0.398842 | 0.904686 | Psoriasis                                    | 0.011751 | Diseases of the musculoskeletal system and connective tissue                                        |
| 17  | 0.410899 | 0.858498 | Anxiety disorders                            | 0.041914 | Mental and behavioural disorders                                                                    |
| 146 | 0.433645 | 0.969406 | Menorrhagia and polymenorrhoea               | 0.015504 | Diseases of the genitourinary system                                                                |
| 113 | 0.489456 | 0.905032 | Hypo or hyperthyroidism                      | 0.047897 | Endocrine, nutritional and metabolic diseases                                                       |
| 302 | 0.491672 | 0.855823 | Vitamin B12 deficiency anaemia               | 0.014489 | Diseases of the blood and blood-forming organs and certain disorders involving the immune mechanism |
| 51  | 0.501496 | 0.923082 | Chronic obstructive pulmonary disease (COPD) | 0.036869 | Diseases of the respiratory system                                                                  |
| 23  | 0.514881 | 0.901268 | Atrial Fibrillation and flutter              | 0.077629 | Diseases of the circulatory system                                                                  |
| 110 | 0.531597 | 0.819527 | Hypertension                                 | 0.200618 | Diseases of the circulatory system                                                                  |
| 61  | 0.542223 | 0.950442 | Dementia                                     | 0.024656 | Mental and behavioural disorders                                                                    |
| 62  | 0.553561 | 0.877904 | Depression                                   | 0.076876 | Mental and behavioural disorders                                                                    |
| 85  | 0.573880 | 0.934049 | Female genital prolapse                      | 0.015781 | Diseases of the genitourinary system                                                                |
| 220 | 0.575574 | 0.964776 | Primary Malignancy Prostate                  | 0.011844 | Neoplasms                                                                                           |
| 6   | 0.583305 | 0.952656 | Alcohol Problems                             | 0.014535 | Mental and behavioural disorders                                                                    |
| 194 | 0.647243 | 0.955062 | Polymyalgia Rheumatica                       | 0.013213 | Diseases of the musculoskeletal system and connective tissue                                        |
| 80  | 0.648763 | 0.977907 | Epilepsy                                     | 0.016104 | Diseases of the nervous system                                                                      |

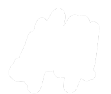



## Comparison of APS/AUROC across Models

Figure S1, shows the performance three models, in terms of AUROC and APS, for each and every disease with a prevalence of 1% or higher. BEHRT’s predictions remain in the upper right quadrant of the graph (for the most part) demonstrating a higher APS/AUROC than the other two models.

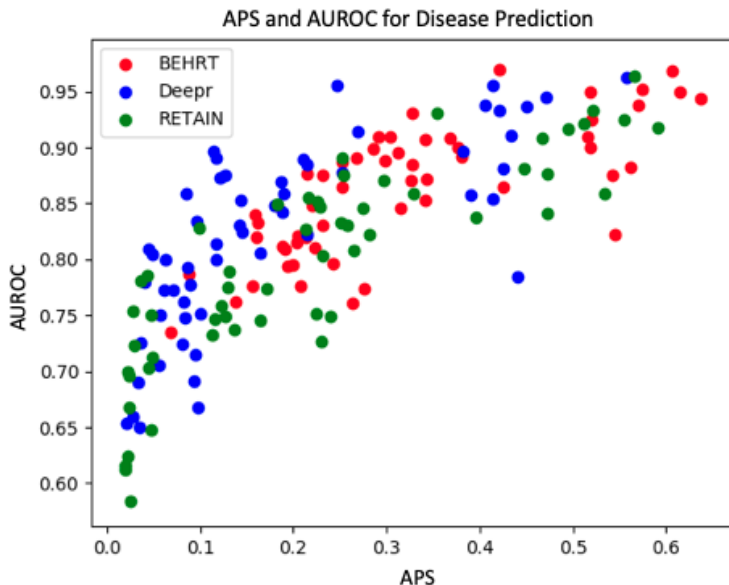

**Figure S1.** Disease-wise performance comparison for BEHRT, Deepr and RETAIN, all models trained on same dataset and trained on the same task (next 6 months), each point represents the APS/AUROC of one disease on corresponding model.

## Gender-Specific Disease Analysis

Table S7 illustrates the predictive performance of the model for gender-specific diseases. Male and female predictions in the table represent the number of patients with predictive probability above 0.5 for that gender, and disease gender indicates whether a disease is a male-specific or female-specific disease. M and F represent male and female respectively.

**Table S7.** Predictions of Gender-Specific Diseases (Test Predictions from Next 6 Months)

| Disease Name                   | Disease Gender | Male Predictions | Female Predictions |
|--------------------------------|----------------|------------------|--------------------|
| Hyperplasia of Prostate        | M              | 384              | 0                  |
| Hydrocoele (incl infected)     | M              | 36               | 0                  |
| Male Infertility               | M              | 1                | 24                 |
| Primary Malignancy Prostate    | M              | 557              | 0                  |
| Erectile Dysfunction           | M              | 425              | 1                  |
| Menorrhagia and Polymenorrhoea | F              | 0                | 697                |
| Endometriosis                  | F              | 0                | 47                 |
| Female Genital Prolapse        | F              | 0                | 865                |
| Female Infertility             | F              | 2                | 36                 |
| Benign Neoplasm of Ovary       | F              | 0                | 69                 |
| Postmenopausal Bleeding        | F              | 0                | 140                |
| Primary Malignancy Breast      | F              | 0                | 11                 |
| Primary Malignancy Ovarian     | F              | 1                | 193                |

Male (M) and Female (F) Predictions imply label predictions >0.5

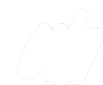

## Feature importance comparison

Table S8 illustrates an ablation study to selectively remove features (age, segment and position) to understand the importance of each feature.

**Table S8.** Feature Importance Comparison for the Next 6 Months Prediction Task

| Disease | Features |         |          | Metrics |       |
|---------|----------|---------|----------|---------|-------|
|         | Age      | Segment | Position | APS     | AUROC |
| 1       | 1        | 1       | 1        | 0.525   | 0.958 |
| 1       | 0        | 1       | 1        | 0.515   | 0.954 |
| 1       | 1        | 0       | 1        | 0.511   | 0.954 |
| 1       | 1        | 1       | 0        | 0.498   | 0.954 |
| 1       | 0        | 1       | 0        | 0.451   | 0.952 |
| 1       | 1        | 0       | 0        | 0.501   | 0.955 |
| 1       | 0        | 0       | 0        | 0.446   | 0.951 |

1: Features activated, 0: Features deactivated

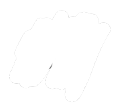

Supplement: 41598_2020_62922_MOESM1_ESM.pdf [file 41598_2020_62922_MOESM1_ESM.pdf]
